# Supplementary figures and images for: Heterogeneous terahertz quantum cascade lasers exceeding 1.9 THz spectral bandwidth and featuring dual comb operation
Source: publisher site journal article supplement (doi:10.1515/nanoph-2017-0024), 2017-09-05

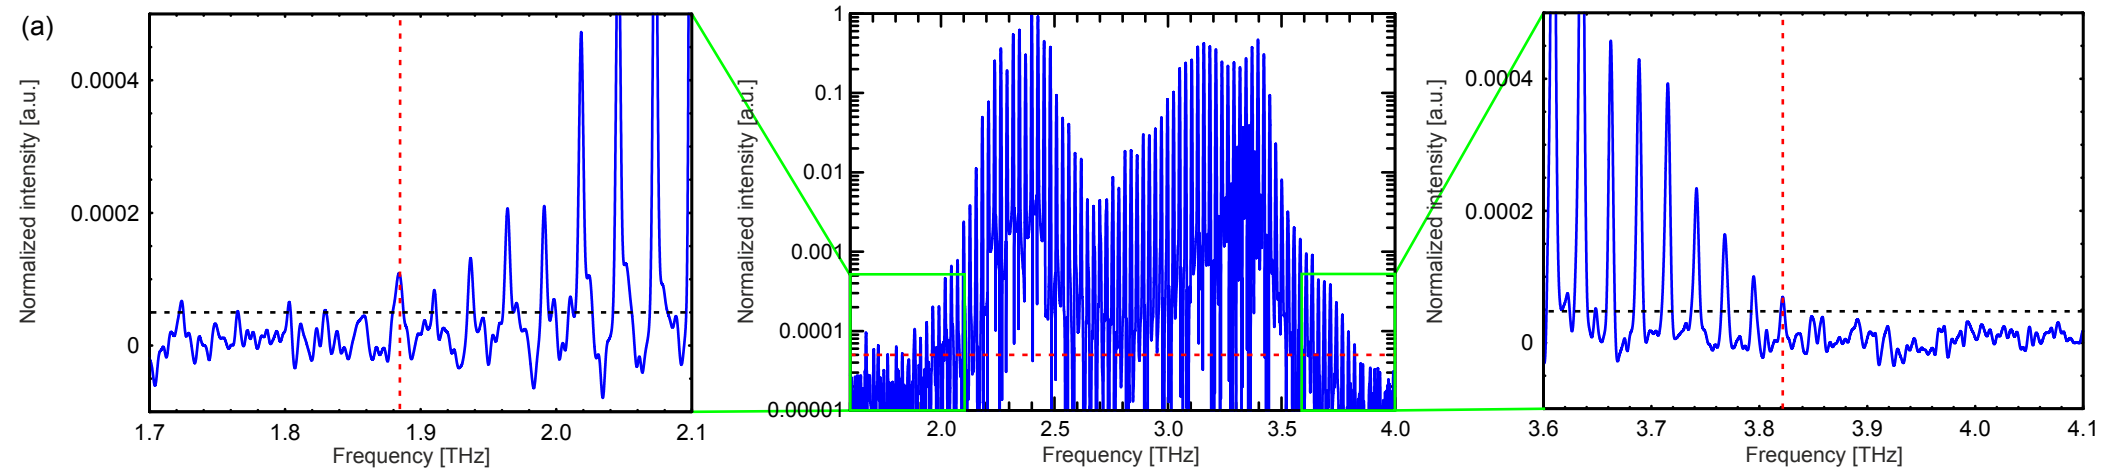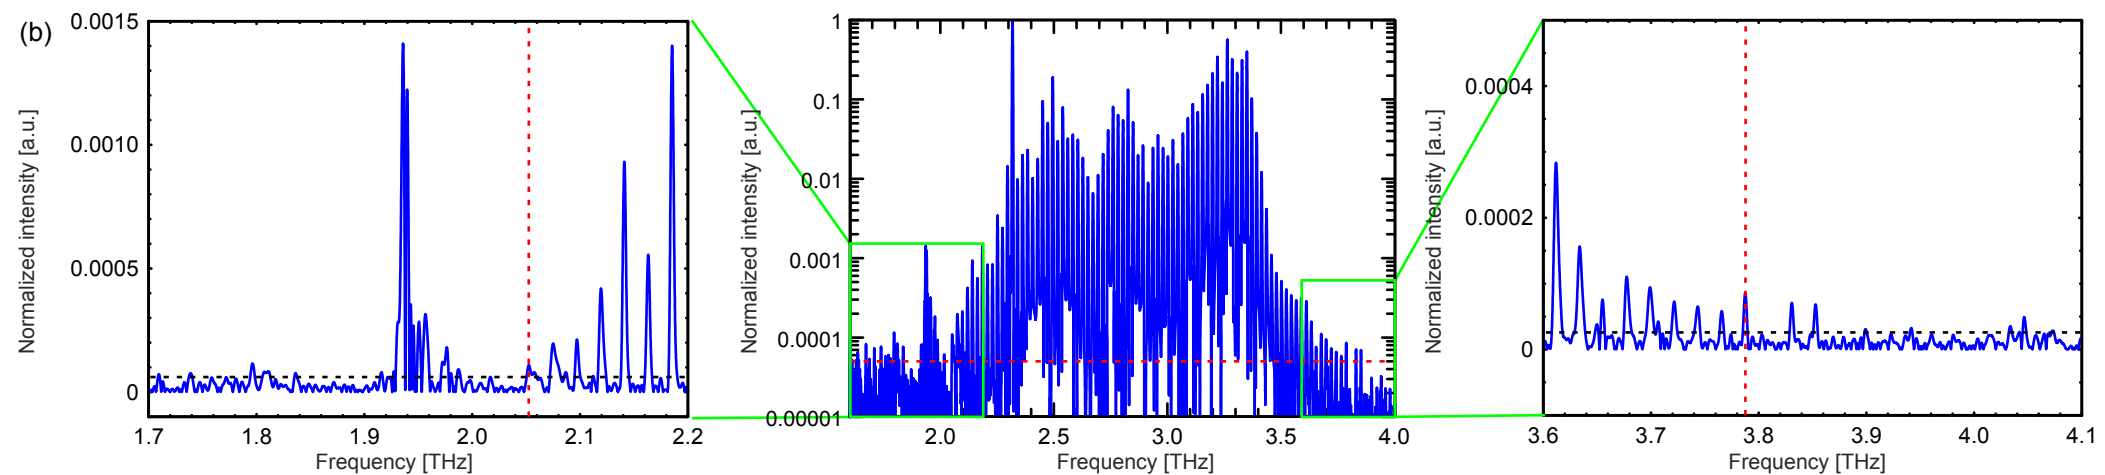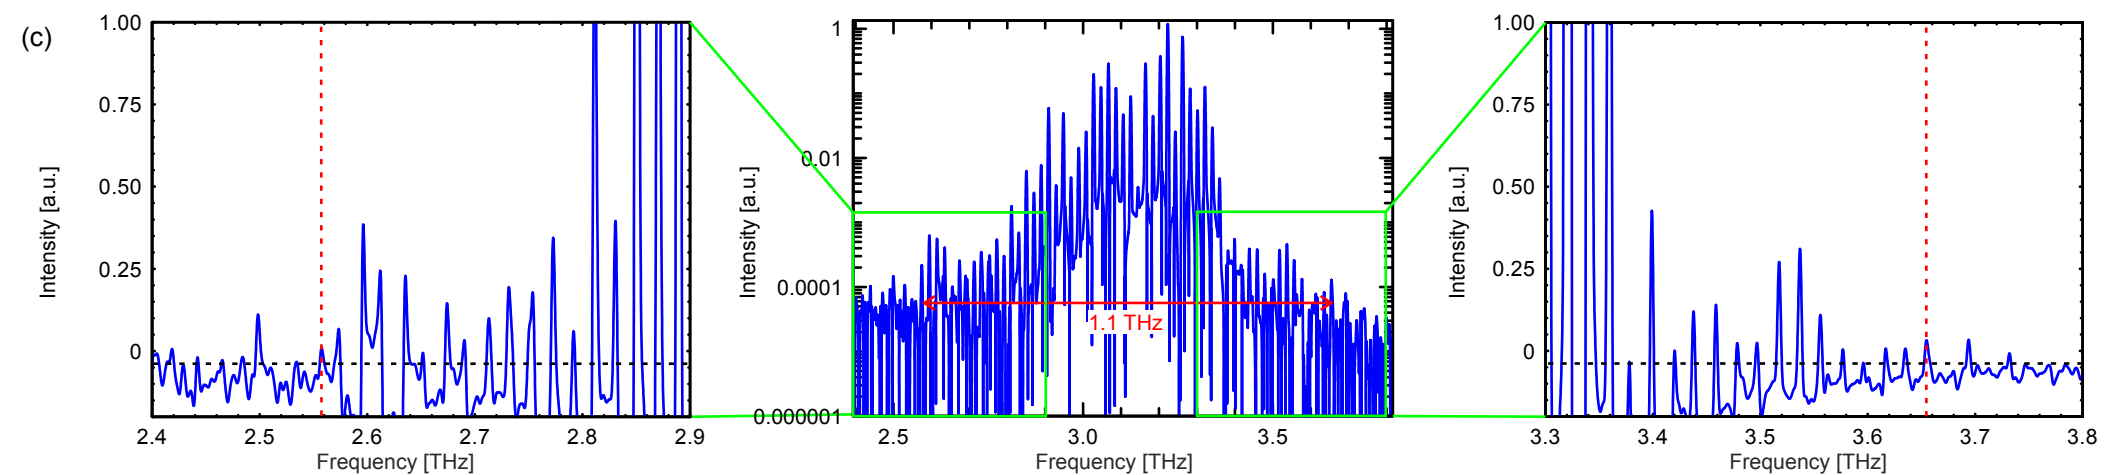

Supplement: Supplementary file 1 [file sfigure1.pdf › sfigure1.pdf]

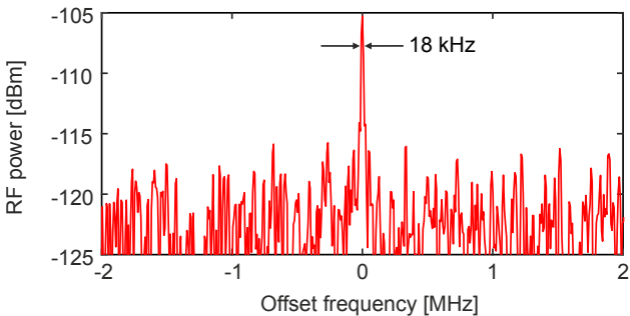

Supplement: Supplementary file 2 [file sfigure2.pdf › sfigure2.pdf]
